# Supplementary material
Source: HighWire-hosted journal article supplement (https://www.cmajopen.ca/highwire/filestream/87019/field_highwire_adjunct_files/2/2020-0192-3-at.pdf)

**FAX THIS PAGE TO COLON SCREENING PROGRAM: 1 (604) 297-9340**

CONFIDENTIAL FOR QUALITY ASSURANCE PURPOSES

|                           |                         |                   |                          |
|---------------------------|-------------------------|-------------------|--------------------------|
| EXAM DATE (YYYYMMDD)      | QM REVIEW CODE          | PHN               | DATE OF BIRTH (YYYYMMDD) |
| QM REVIEW DATE (YYYYMMDD) | AMENDED DATE (YYYYMMDD) | PATIENT NAME LAST | PATIENT NAME FIRST       |
| REVIEWER (MSC)            | REVIEWER LAST, FIRST    | SEX (F/M/X)       |                          |

**COLON SCREENING PROGRAM ADMINISTRATIVE USE ONLY**

SAE:  Yes  No **Related to Colonoscopy:**  Probably  Possibly  Unlikely  Not an UPE

Letter to Colonoscopist \_\_\_\_\_

Comments: \_\_\_\_\_

**PRIMARY TYPE**

|                                                         |                                                    |                                               |
|---------------------------------------------------------|----------------------------------------------------|-----------------------------------------------|
| <input type="checkbox"/> Death                          | <input type="checkbox"/> Post polypectomy syndrome | <input type="checkbox"/> Thromboembolic event |
| <input type="checkbox"/> Perforation                    | <input type="checkbox"/> Splenic injury            | <input type="checkbox"/> Cholecystitis        |
| <input type="checkbox"/> Post polypectomy bleeding      | <input type="checkbox"/> Appendicitis              | <input type="checkbox"/> Ischemic colitis     |
| <input type="checkbox"/> Bowel preparation complication | <input type="checkbox"/> Respiratory               | <input type="checkbox"/> Infection _____      |
| <input type="checkbox"/> Cardiac                        | <input type="checkbox"/> Sedation complication     | <input type="checkbox"/> Bleeding other _____ |
| <input type="checkbox"/> Diverticulitis                 | <input type="checkbox"/> Small bowel obstruction   | <input type="checkbox"/> Other _____          |

**SECONDARY TYPE**

|                                                       |                                               |                                            |
|-------------------------------------------------------|-----------------------------------------------|--------------------------------------------|
| <input type="checkbox"/> Myocardial infarction        | <input type="checkbox"/> Aspiration pneumonia | <input type="checkbox"/> Head injury       |
| <input type="checkbox"/> Arrhythmia                   | <input type="checkbox"/> Laceration           | <input type="checkbox"/> Hypotension       |
| <input type="checkbox"/> Stroke: Ischemic/Hemorrhagic | <input type="checkbox"/> Fall                 | <input type="checkbox"/> COPD exacerbation |
| <input type="checkbox"/> Kidney injury                | <input type="checkbox"/> Hypoxia              | <input type="checkbox"/> Hematemesis       |
| <input type="checkbox"/> Electrolyte abnormality      | <input type="checkbox"/> Seizure              | <input type="checkbox"/> Fracture          |
| <input type="checkbox"/> Other _____                  |                                               |                                            |

**TREATMENT**

|                                                                     |                                                  |                                         |
|---------------------------------------------------------------------|--------------------------------------------------|-----------------------------------------|
| <input type="checkbox"/> Blood transfusion                          | <input type="checkbox"/> Surgery                 | <input type="checkbox"/> Cardioversion  |
| <input type="checkbox"/> Repeat colonoscopy                         | <input type="checkbox"/> IR Intervention         | <input type="checkbox"/> Reversal agent |
| <input type="checkbox"/> Clips <input type="checkbox"/> Injection   | <input type="checkbox"/> Conservative management |                                         |
| <input type="checkbox"/> Cautery <input type="checkbox"/> Hemospray | <input type="checkbox"/> Other _____             |                                         |

**CAUSE**

|                                                                                                                                                                                                                                                                                                                                                                                                                                                                                                                                                                                                                                                                                                                                                                                  |                                                |                                                                       |            |                                 |                              |                              |                               |                             |                             |                                     |                                  |                                  |                                    |  |  |                                |                                                |  |                                      |  |  |                                                                                                                                                                                                                                                                                                                                                                                        |           |                                 |                               |                                     |                                    |                                |                                  |                                                                                                                                                                                                                                                                                                                                                                                                                       |
|----------------------------------------------------------------------------------------------------------------------------------------------------------------------------------------------------------------------------------------------------------------------------------------------------------------------------------------------------------------------------------------------------------------------------------------------------------------------------------------------------------------------------------------------------------------------------------------------------------------------------------------------------------------------------------------------------------------------------------------------------------------------------------|------------------------------------------------|-----------------------------------------------------------------------|------------|---------------------------------|------------------------------|------------------------------|-------------------------------|-----------------------------|-----------------------------|-------------------------------------|----------------------------------|----------------------------------|------------------------------------|--|--|--------------------------------|------------------------------------------------|--|--------------------------------------|--|--|----------------------------------------------------------------------------------------------------------------------------------------------------------------------------------------------------------------------------------------------------------------------------------------------------------------------------------------------------------------------------------------|-----------|---------------------------------|-------------------------------|-------------------------------------|------------------------------------|--------------------------------|----------------------------------|-----------------------------------------------------------------------------------------------------------------------------------------------------------------------------------------------------------------------------------------------------------------------------------------------------------------------------------------------------------------------------------------------------------------------|
| <input type="checkbox"/> Post-polypectomy                                                                                                                                                                                                                                                                                                                                                                                                                                                                                                                                                                                                                                                                                                                                        | <input type="checkbox"/> Unstable Loop         | <input type="checkbox"/> Angioectasia treatment                       |            |                                 |                              |                              |                               |                             |                             |                                     |                                  |                                  |                                    |  |  |                                |                                                |  |                                      |  |  |                                                                                                                                                                                                                                                                                                                                                                                        |           |                                 |                               |                                     |                                    |                                |                                  |                                                                                                                                                                                                                                                                                                                                                                                                                       |
| <table border="1"> <tr> <td>Location:</td> <td>SMI:</td> <td>Hot Snare:</td> </tr> <tr> <td><input type="checkbox"/> Rectum</td> <td><input type="checkbox"/> Yes</td> <td><input type="checkbox"/> Yes</td> </tr> <tr> <td><input type="checkbox"/> Left</td> <td><input type="checkbox"/> No</td> <td><input type="checkbox"/> No</td> </tr> <tr> <td><input type="checkbox"/> Transverse</td> <td><input type="checkbox"/> Unknown</td> <td><input type="checkbox"/> Unknown</td> </tr> <tr> <td><input type="checkbox"/> Ascending</td> <td></td> <td></td> </tr> <tr> <td><input type="checkbox"/> Cecum</td> <td><input type="checkbox"/> Prophylactic Clipping</td> <td></td> </tr> <tr> <td><input type="checkbox"/> Other _____</td> <td></td> <td></td> </tr> </table> | Location:                                      | SMI:                                                                  | Hot Snare: | <input type="checkbox"/> Rectum | <input type="checkbox"/> Yes | <input type="checkbox"/> Yes | <input type="checkbox"/> Left | <input type="checkbox"/> No | <input type="checkbox"/> No | <input type="checkbox"/> Transverse | <input type="checkbox"/> Unknown | <input type="checkbox"/> Unknown | <input type="checkbox"/> Ascending |  |  | <input type="checkbox"/> Cecum | <input type="checkbox"/> Prophylactic Clipping |  | <input type="checkbox"/> Other _____ |  |  | <table border="1"> <tr> <td>Location:</td> </tr> <tr> <td><input type="checkbox"/> Rectum</td> </tr> <tr> <td><input type="checkbox"/> Left</td> </tr> <tr> <td><input type="checkbox"/> Transverse</td> </tr> <tr> <td><input type="checkbox"/> Ascending</td> </tr> <tr> <td><input type="checkbox"/> Cecum</td> </tr> <tr> <td><input type="checkbox"/> Unknown</td> </tr> </table> | Location: | <input type="checkbox"/> Rectum | <input type="checkbox"/> Left | <input type="checkbox"/> Transverse | <input type="checkbox"/> Ascending | <input type="checkbox"/> Cecum | <input type="checkbox"/> Unknown | Incidental:<br><input type="checkbox"/> Yes <input type="checkbox"/> No <input type="checkbox"/> Unknown<br><input type="checkbox"/> Coagulation at polypectomy site<br>Soft coagulation<br><input type="checkbox"/> Yes <input type="checkbox"/> No <input type="checkbox"/> Unknown<br><input type="checkbox"/> Hemorrhoids<br><input type="checkbox"/> Deep sedation _____<br><input type="checkbox"/> Other _____ |
| Location:                                                                                                                                                                                                                                                                                                                                                                                                                                                                                                                                                                                                                                                                                                                                                                        | SMI:                                           | Hot Snare:                                                            |            |                                 |                              |                              |                               |                             |                             |                                     |                                  |                                  |                                    |  |  |                                |                                                |  |                                      |  |  |                                                                                                                                                                                                                                                                                                                                                                                        |           |                                 |                               |                                     |                                    |                                |                                  |                                                                                                                                                                                                                                                                                                                                                                                                                       |
| <input type="checkbox"/> Rectum                                                                                                                                                                                                                                                                                                                                                                                                                                                                                                                                                                                                                                                                                                                                                  | <input type="checkbox"/> Yes                   | <input type="checkbox"/> Yes                                          |            |                                 |                              |                              |                               |                             |                             |                                     |                                  |                                  |                                    |  |  |                                |                                                |  |                                      |  |  |                                                                                                                                                                                                                                                                                                                                                                                        |           |                                 |                               |                                     |                                    |                                |                                  |                                                                                                                                                                                                                                                                                                                                                                                                                       |
| <input type="checkbox"/> Left                                                                                                                                                                                                                                                                                                                                                                                                                                                                                                                                                                                                                                                                                                                                                    | <input type="checkbox"/> No                    | <input type="checkbox"/> No                                           |            |                                 |                              |                              |                               |                             |                             |                                     |                                  |                                  |                                    |  |  |                                |                                                |  |                                      |  |  |                                                                                                                                                                                                                                                                                                                                                                                        |           |                                 |                               |                                     |                                    |                                |                                  |                                                                                                                                                                                                                                                                                                                                                                                                                       |
| <input type="checkbox"/> Transverse                                                                                                                                                                                                                                                                                                                                                                                                                                                                                                                                                                                                                                                                                                                                              | <input type="checkbox"/> Unknown               | <input type="checkbox"/> Unknown                                      |            |                                 |                              |                              |                               |                             |                             |                                     |                                  |                                  |                                    |  |  |                                |                                                |  |                                      |  |  |                                                                                                                                                                                                                                                                                                                                                                                        |           |                                 |                               |                                     |                                    |                                |                                  |                                                                                                                                                                                                                                                                                                                                                                                                                       |
| <input type="checkbox"/> Ascending                                                                                                                                                                                                                                                                                                                                                                                                                                                                                                                                                                                                                                                                                                                                               |                                                |                                                                       |            |                                 |                              |                              |                               |                             |                             |                                     |                                  |                                  |                                    |  |  |                                |                                                |  |                                      |  |  |                                                                                                                                                                                                                                                                                                                                                                                        |           |                                 |                               |                                     |                                    |                                |                                  |                                                                                                                                                                                                                                                                                                                                                                                                                       |
| <input type="checkbox"/> Cecum                                                                                                                                                                                                                                                                                                                                                                                                                                                                                                                                                                                                                                                                                                                                                   | <input type="checkbox"/> Prophylactic Clipping |                                                                       |            |                                 |                              |                              |                               |                             |                             |                                     |                                  |                                  |                                    |  |  |                                |                                                |  |                                      |  |  |                                                                                                                                                                                                                                                                                                                                                                                        |           |                                 |                               |                                     |                                    |                                |                                  |                                                                                                                                                                                                                                                                                                                                                                                                                       |
| <input type="checkbox"/> Other _____                                                                                                                                                                                                                                                                                                                                                                                                                                                                                                                                                                                                                                                                                                                                             |                                                |                                                                       |            |                                 |                              |                              |                               |                             |                             |                                     |                                  |                                  |                                    |  |  |                                |                                                |  |                                      |  |  |                                                                                                                                                                                                                                                                                                                                                                                        |           |                                 |                               |                                     |                                    |                                |                                  |                                                                                                                                                                                                                                                                                                                                                                                                                       |
| Location:                                                                                                                                                                                                                                                                                                                                                                                                                                                                                                                                                                                                                                                                                                                                                                        |                                                |                                                                       |            |                                 |                              |                              |                               |                             |                             |                                     |                                  |                                  |                                    |  |  |                                |                                                |  |                                      |  |  |                                                                                                                                                                                                                                                                                                                                                                                        |           |                                 |                               |                                     |                                    |                                |                                  |                                                                                                                                                                                                                                                                                                                                                                                                                       |
| <input type="checkbox"/> Rectum                                                                                                                                                                                                                                                                                                                                                                                                                                                                                                                                                                                                                                                                                                                                                  |                                                |                                                                       |            |                                 |                              |                              |                               |                             |                             |                                     |                                  |                                  |                                    |  |  |                                |                                                |  |                                      |  |  |                                                                                                                                                                                                                                                                                                                                                                                        |           |                                 |                               |                                     |                                    |                                |                                  |                                                                                                                                                                                                                                                                                                                                                                                                                       |
| <input type="checkbox"/> Left                                                                                                                                                                                                                                                                                                                                                                                                                                                                                                                                                                                                                                                                                                                                                    |                                                |                                                                       |            |                                 |                              |                              |                               |                             |                             |                                     |                                  |                                  |                                    |  |  |                                |                                                |  |                                      |  |  |                                                                                                                                                                                                                                                                                                                                                                                        |           |                                 |                               |                                     |                                    |                                |                                  |                                                                                                                                                                                                                                                                                                                                                                                                                       |
| <input type="checkbox"/> Transverse                                                                                                                                                                                                                                                                                                                                                                                                                                                                                                                                                                                                                                                                                                                                              |                                                |                                                                       |            |                                 |                              |                              |                               |                             |                             |                                     |                                  |                                  |                                    |  |  |                                |                                                |  |                                      |  |  |                                                                                                                                                                                                                                                                                                                                                                                        |           |                                 |                               |                                     |                                    |                                |                                  |                                                                                                                                                                                                                                                                                                                                                                                                                       |
| <input type="checkbox"/> Ascending                                                                                                                                                                                                                                                                                                                                                                                                                                                                                                                                                                                                                                                                                                                                               |                                                |                                                                       |            |                                 |                              |                              |                               |                             |                             |                                     |                                  |                                  |                                    |  |  |                                |                                                |  |                                      |  |  |                                                                                                                                                                                                                                                                                                                                                                                        |           |                                 |                               |                                     |                                    |                                |                                  |                                                                                                                                                                                                                                                                                                                                                                                                                       |
| <input type="checkbox"/> Cecum                                                                                                                                                                                                                                                                                                                                                                                                                                                                                                                                                                                                                                                                                                                                                   |                                                |                                                                       |            |                                 |                              |                              |                               |                             |                             |                                     |                                  |                                  |                                    |  |  |                                |                                                |  |                                      |  |  |                                                                                                                                                                                                                                                                                                                                                                                        |           |                                 |                               |                                     |                                    |                                |                                  |                                                                                                                                                                                                                                                                                                                                                                                                                       |
| <input type="checkbox"/> Unknown                                                                                                                                                                                                                                                                                                                                                                                                                                                                                                                                                                                                                                                                                                                                                 |                                                |                                                                       |            |                                 |                              |                              |                               |                             |                             |                                     |                                  |                                  |                                    |  |  |                                |                                                |  |                                      |  |  |                                                                                                                                                                                                                                                                                                                                                                                        |           |                                 |                               |                                     |                                    |                                |                                  |                                                                                                                                                                                                                                                                                                                                                                                                                       |
| <input type="checkbox"/> Diverticulosis                                                                                                                                                                                                                                                                                                                                                                                                                                                                                                                                                                                                                                                                                                                                          | <input type="checkbox"/> Retroflexion          | <input type="checkbox"/> Inappropriate management of anti-thrombotics |            |                                 |                              |                              |                               |                             |                             |                                     |                                  |                                  |                                    |  |  |                                |                                                |  |                                      |  |  |                                                                                                                                                                                                                                                                                                                                                                                        |           |                                 |                               |                                     |                                    |                                |                                  |                                                                                                                                                                                                                                                                                                                                                                                                                       |
| <input type="checkbox"/> Bisacodyl                                                                                                                                                                                                                                                                                                                                                                                                                                                                                                                                                                                                                                                                                                                                               | <input type="checkbox"/> Buscopan              |                                                                       |            |                                 |                              |                              |                               |                             |                             |                                     |                                  |                                  |                                    |  |  |                                |                                                |  |                                      |  |  |                                                                                                                                                                                                                                                                                                                                                                                        |           |                                 |                               |                                     |                                    |                                |                                  |                                                                                                                                                                                                                                                                                                                                                                                                                       |

20520

INFORMATION ON THIS FORM IS CONFIDENTIAL  
IF YOU RECEIVE THIS IN ERROR PLEASE FAX TO  
QUALITY DEPT: 1 (604) 675-7223

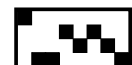

Supplement: 2020-0192-3-at.pdf [file 2020-0192-3-at.pdf]
